# Supplementary material for: Circular RNAs exhibit limited evidence for translation, or translation regulation of the mRNA-counterpart in terminal hematopoiesis
Source: bioRxiv or medRxiv preprint supplement (doi:10.1101/2020.10.22.348276), 2021-03-04

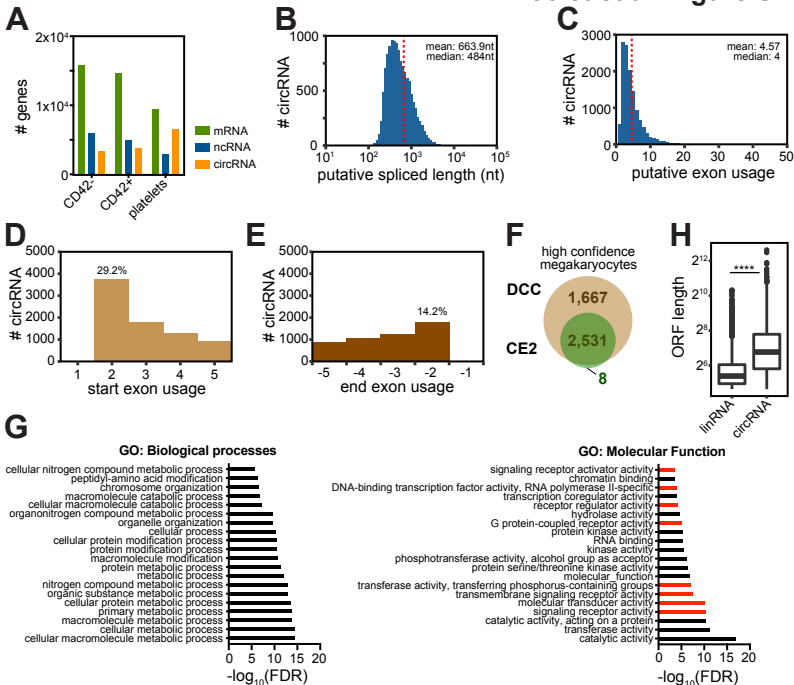

Supplement: Supplementary file [file media-3.pdf]
