# Supplementary material for: Circular RNAs exhibit limited evidence for translation, or translation regulation of the mRNA-counterpart in terminal hematopoiesis
Source: bioRxiv or medRxiv preprint supplement (doi:10.1101/2020.10.22.348276), 2021-03-04

**A**

■ cds    ■ 5'utrs    ■ 3'utrs    ■ nc Isoforms  
■ ncRNAs    ■ introns    ■ intergenic

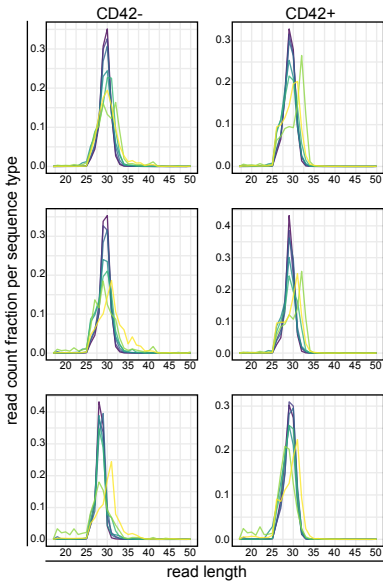**B**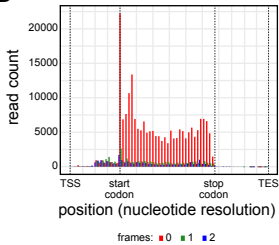**C**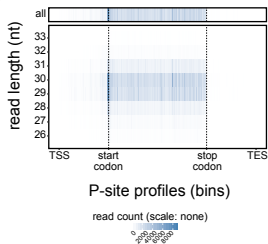

Supplement: Supplementary file [file media-4.pdf]
